# Supplementary material for: Sorbents Coupled to Solar Light TiO2-Based Photocatalysts for Olive Mill Wastewater Treatment
Source: Hindawi journal article supplement (doi:10.1155/2016/8793841), 2016-01-01
Supplement: f1 [file 8793841.f1.docx]

**International Journal of Photoenergy**

***Supplementary Information***

**Sorbents coupled to solar light TiO2-based photocatalysts for olive mill wastewater treatment**

Andrea Speltini1, Federica Maraschi1, Michela Sturini1, Valentina Caratto2, Maurizio Ferretti2,

Antonella Profumo1*

*1Department of Chemistry, University of Pavia, via Taramelli 12, 27100 Pavia, Italy*

*2Department of Chemistry and Industrial Chemistry, University of Genoa, via Dodecaneso 31, 16146 Genova, Italy*

**Corresponding author. Tel.: +39 0382-987581; fax: +39 0382-528544.*

*E-mail address:* antonella.profumo@unipv.it (A. Profumo)


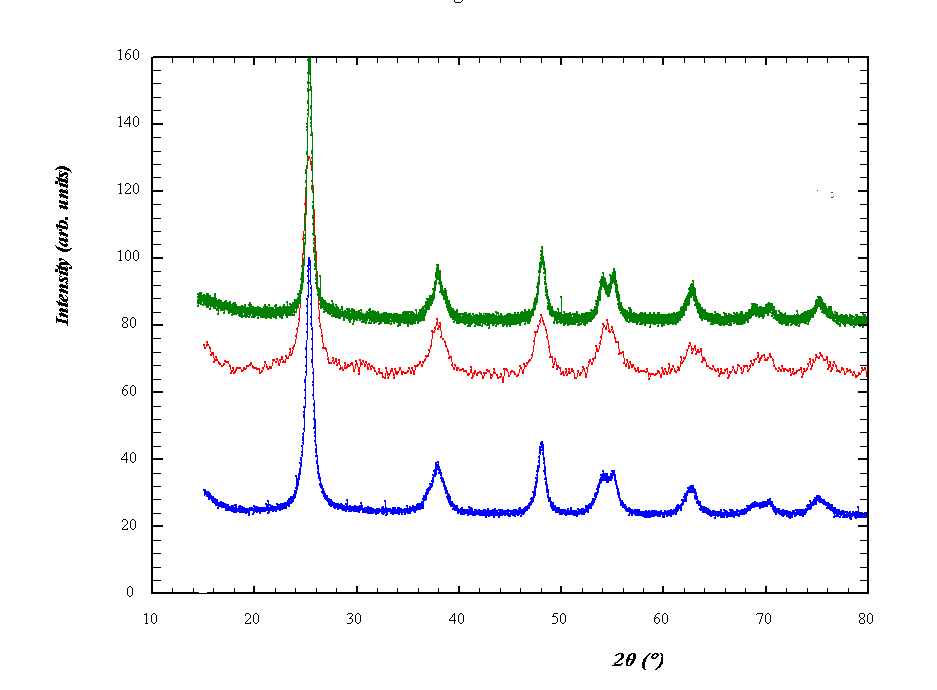


**Figure S1**: XRD spectra of TiO2 (red), N-doped TiO2 (green) and TiO2@ZY (blue).


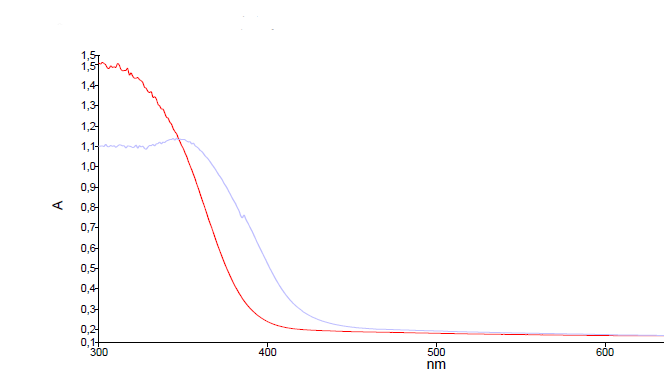


**Figure S2**. DRS spectra of TiO2 (red) and N-doped TiO2 (blue).

**Figure S3.** UV-Vis spectra of 1:10 OMW (green) and 1:10 OMW after treatment with 10 g L-1 ZY (blue)

| 1:10 OMW | | | 1:10 OMW after ZY contact | | |
| --- | --- | --- | --- | --- | --- |
| Wavelength (nm) | Absorbance | Wavelength (nm) | | Absorbance | |
| 310 | 2.27 | 310 | | 1.91 |
| 360 | 1.59 | 360 | | 1.33 |
| 400 | 1.10 | 400 | | 0.95 |
| 420 | 0.68 | 420 | | 0.56 |

**Table S1.** Absorbance values at different wavelengths recorded on 1:10 OMW before and after treatment with 10 g L-1 ZY
